# Supplementary material
Source: PubMed Central journal article supplement (PMC5511766)
Supplement: NIHMS845591-supplement-2.pdf [file NIHMS845591-supplement-2.pdf]

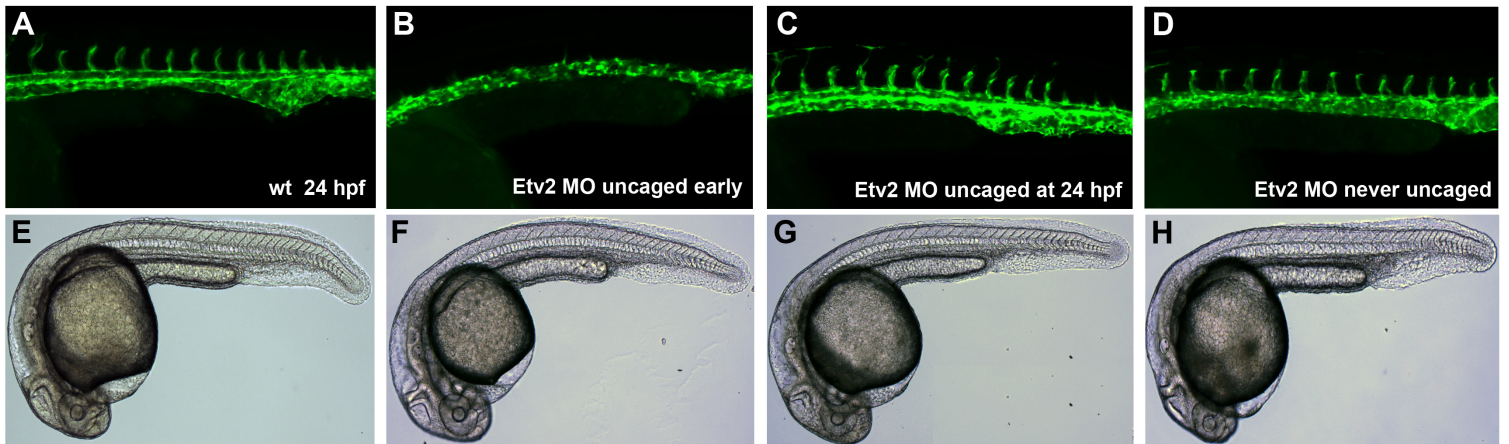

**Supplemental Figure S1. Specific inhibition of vascular development in *fli1a:GFP* reporter line using photoactivatable Etv2 MO.**

(A-D) Fluorescent images of the trunk region; (E-H) brightfield images at 24 hpf. (A,E) Control uninjected embryo; (B,F) Etv2 MO uncaged at the 50% epiboly stage; (C,D) Etv2 MO uncaged at 24 hpf just before imaging; (D,H) Etv2 MO injected embryo which was not subjected to uncaging. Note that the early uncaged embryo exhibits an absence of intersegmental vessels and has defects in vasculogenesis (B), while the embryos uncaged at 24 hpf (C) and never uncaged (D) are phenotypically normal.
